# Supplementary material
Source: PubMed Central journal article supplement (PMC6321993)
Supplement: AnnalsATS.201712-921OC_tsai_data_supplement.pdf [file AnnalsATS.201712-921OC_tsai_data_supplement.pdf]

## **Online Data Supplement**

### **Early Life Weight Gain and Development of Childhood Asthma in a Prospective Birth Cohort**

Hui-Ju Tsai, MPH PhD, Guoying Wang, MD PhD, Xiumei Hong, MD PhD, Tsung-Chieh Yao, MD, PhD, Yuelong Ji, MS, Sally Radovick, MD, Hongkai Ji, PhD, Tina L. Cheng, MD MPH, Xiaobin Wang, MD ScD

**Table E1.** The baseline characteristics of the included and excluded participant samples

| <b>Variables</b>                                                     | <b>Subjects in the included sample (1,928)</b> | <b>Subjects in the excluded sample (1,006)</b> |
|----------------------------------------------------------------------|------------------------------------------------|------------------------------------------------|
| <b>Maternal characteristics</b>                                      |                                                |                                                |
| <b>Maternal age</b> (years), mean (SD)                               | 28.6 (6.6)                                     | 27.9 (6.4)                                     |
| <b>Pre-pregnancy BMI</b> (kg/m <sup>2</sup> ), mean (SD)             | 26.7 (6.6)                                     | 25.6 (6.1)                                     |
| <b>Null parity</b> , <i>n</i> (%)                                    | 836 (42.5)                                     | 423 (42.0)                                     |
| <b>Breast versus formula feeding</b> , <i>n</i> (%)                  |                                                |                                                |
| Formula only                                                         | 474 (24.6)                                     | NA                                             |
| Exclusively breastfed                                                | 150 (7.8)                                      | NA                                             |
| Both                                                                 | 1,300 (67.6)                                   | NA                                             |
| <b>Maternal history of asthma</b> , yes <i>n</i> (%)                 | 259 (13.6)                                     | NA                                             |
| <b>Gestational diabetes</b> , yes <i>n</i> (%)                       | 92 (4.7)                                       | 52 (5.1)                                       |
| <b>Hypertensive disorder</b> , yes <i>n</i> (%)*                     | 129 (6.6)                                      | 46 (4.6)                                       |
| <b>Education</b> , <i>n</i> (%)                                      |                                                |                                                |
| High school or less                                                  | 1,711 (87.3)                                   | 852 (84.7)                                     |
| College or higher                                                    | 248 (12.7)                                     | 154 (15.3)                                     |
| <b>Maternal smoking during pregnancy</b> , <i>n</i> (%)*             |                                                |                                                |
| Never                                                                | 1,597 (81.9)                                   | 805 (80.0)                                     |
| Quitter                                                              | 154 (7.9)                                      | 67 (7.0)                                       |
| Current smoker                                                       | 200 (10.3)                                     | 134 (13.3)                                     |
| <b>Maternal alcohol drinking during pregnancy</b> , yes <i>n</i> (%) | 141 (7.4)                                      | 87 (8.6)                                       |
| <b>Child characteristics</b>                                         |                                                |                                                |
| <b>Child age</b> (years), mean (SD) <sup>b</sup>                     | 7.9 (3.3)                                      | 7.4 (3.7)                                      |
| <b>Sex</b> , male <i>n</i> (%)                                       | 991 (50.4)                                     | 504 (50.1)                                     |
| <b>Birthweight</b> (g), mean (SD)*                                   | 2917.1 (812.8)                                 | 2979.6 (753.2)                                 |
| <b>Gestational age</b> (weeks), mean (SD)*                           | 37.7 (3.5)                                     | 38.0 (3.1)                                     |
| <b>Preterm birth</b> (gestational age <37), <i>n</i> (%)*            | 526 (26.7)                                     | 270 (26.8)                                     |
| <b>Ever asthma</b> , yes <i>n</i> (%)*                               | 510 (26.5)                                     | NA                                             |
| <b>Birth weight for gestation</b> , <i>n</i> (%)*                    |                                                |                                                |
| Small for gestational age                                            | 248 (12.6)                                     | 125 (12.4)                                     |
| Appropriate for gestational age                                      | 1,532 (77.9)                                   | 787 (78.2)                                     |
| Large for gestational age                                            | 188 (9.6)                                      | 87 (9.3)                                       |

**Table E2.** Sensitivity analyses of the association of weight gain and BMI attained status in the first 12 months, respectively, with various asthma definitions.

|                                                                                           | Early life weight gain category |                  |                         |                         | Early-life BMI attained status |                  |                         |
|-------------------------------------------------------------------------------------------|---------------------------------|------------------|-------------------------|-------------------------|--------------------------------|------------------|-------------------------|
|                                                                                           | On track                        | Slow             | Rapid                   | Extremely rapid         | Normal                         | Underweight      | Overweight              |
| <b>Physician-diagnosed ever asthma<sup>b</sup></b>                                        |                                 |                  |                         |                         |                                |                  |                         |
| N <sub>1</sub> /N <sub>2</sub> <sup>*</sup>                                               | 107/568                         | 37/196           | 73/283                  | 270/771                 | 182/905                        | 7/39             | 298/874                 |
| Crude RR (95% CI)                                                                         | Ref                             | 1.00 (0.72-1.40) | <b>1.37 (1.05-1.78)</b> | <b>1.86 (1.53-2.26)</b> | Ref                            | 0.89 (0.45-1.77) | <b>1.70 (1.45-1.99)</b> |
| Adjusted RR (95% CI) <sup>a</sup>                                                         | Ref                             | 0.98 (0.69-1.40) | 1.20 (0.91-1.58)        | <b>1.41 (1.11-1.78)</b> | Ref                            | 0.82 (0.41-1.64) | <b>1.30 (1.07-1.59)</b> |
| <b>Physician-diagnosed recurrent asthma<sup>c</sup></b>                                   |                                 |                  |                         |                         |                                |                  |                         |
| N <sub>1</sub> /N <sub>2</sub> <sup>*</sup>                                               | 96/568                          | 31/196           | 68/283                  | 251/771                 | 155/905                        | 7/39             | 266/874                 |
| Crude RR (95% CI)                                                                         | Ref                             | 0.95 (0.65-1.37) | <b>1.43 (1.08-1.88)</b> | <b>1.89 (1.53-2.33)</b> | Ref                            | 1.04 (0.52-2.06) | <b>1.80 (1.51-2.14)</b> |
| Adjusted RR (95% CI) <sup>a</sup>                                                         | Ref                             | 0.96 (0.65-1.41) | 1.20 (0.90-1.61)        | <b>1.38 (1.07-1.78)</b> | Ref                            | 0.99 (0.50-1.98) | <b>1.41 (1.14-1.73)</b> |
| <b>Physician-diagnosed ever asthma after 6 years of age<sup>d</sup></b>                   |                                 |                  |                         |                         |                                |                  |                         |
| N <sub>1</sub> /N <sub>2</sub> <sup>*</sup>                                               | 81/361                          | 28/138           | 59/193                  | 223/524                 | 131/587                        | 6/29             | 236/582                 |
| Crude RR (95% CI)                                                                         | Ref                             | 0.90 (0.62-1.33) | <b>1.36 (1.02-1.81)</b> | <b>1.90 (1.53-2.35)</b> | Ref                            | 0.90 (0.43-1.87) | <b>1.82 (1.53-2.17)</b> |
| Adjusted RR (95% CI) <sup>a</sup>                                                         | Ref                             | 0.88 (0.58-1.32) | 1.21 (0.89-1.64)        | <b>1.44 (1.11-1.88)</b> | Ref                            | 0.92 (0.43-1.95) | <b>1.43 (1.15-1.77)</b> |
| <b>Physician-diagnosed recurrent asthma after 6 years of age<sup>e</sup></b>              |                                 |                  |                         |                         |                                |                  |                         |
| N <sub>1</sub> /N <sub>2</sub> <sup>*</sup>                                               | 68/361                          | 22/138           | 55/193                  | 191/524                 | 113/587                        | 6/29             | 212/582                 |
| Crude RR (95% CI)                                                                         | Ref                             | 0.85 (0.55-1.32) | <b>1.52 (1.11-2.07)</b> | <b>1.94 (1.52-2.47)</b> | Ref                            | 1.09 (0.52-2.26) | <b>1.91 (1.57-2.33)</b> |
| Adjusted RR (95% CI) <sup>a</sup>                                                         | Ref                             | 0.85 (0.53-1.35) | 1.31 (0.95-1.83)        | <b>1.46 (1.09-1.95)</b> | Ref                            | 1.14 (0.53-2.46) | <b>1.48 (1.17-1.88)</b> |
| <b>Physician-diagnosed asthma after 6 years of age in 2 consecutive years<sup>f</sup></b> |                                 |                  |                         |                         |                                |                  |                         |
| N <sub>1</sub> /N <sub>2</sub> <sup>*</sup>                                               | 66/361                          | 22/138           | 53/193                  | 186/524                 | 110/587                        | 6/29             | 206/582                 |
| Crude RR (95% CI)                                                                         | Ref                             | 0.87 (0.56-1.36) | <b>1.50 (1.09-2.06)</b> | <b>1.94 (1.52-2.49)</b> | Ref                            | 1.14 (0.80-1.63) | <b>1.71 (1.42-2.06)</b> |
| Adjusted RR (95% CI) <sup>a</sup>                                                         | Ref                             | 0.88 (0.55-1.40) | 1.30 (0.93-1.83)        | <b>1.47 (1.09-1.98)</b> | Ref                            | 1.17 (0.55-2.52) | <b>1.49 (1.17-1.90)</b> |

NOTE: **RR**: risk ratio; **CI**: confidence interval.

<sup>\*</sup> N<sub>1</sub>: number of individuals with asthma; N<sub>2</sub>: number of individuals in each exposure group.

<sup>a</sup> Adjusted for maternal age, education, race, smoking, parity, pre-pregnancy BMI, preterm status, birth weight for gestation, maternal history of asthma, hypertensive disorders, gestational diabetes, preterm status, birth weight for gestation, child's age, child's sex, and breastfeeding status.

<sup>b</sup> *Physician-diagnosed ever asthma* was defined, if a child, at age 2 or older, had ever been diagnosed as having asthma by a physician, with an ICD-9-CM code=493.xx;

<sup>c</sup> *Physician-diagnosed recurrent asthma* was defined based on physician-diagnosed with an ICD-9-CM code=493.xx at least two or more times after 2 years of age;

<sup>d</sup> *Physician-diagnosed ever asthma after 6 years of age* was defined as physician-diagnosis with an ICD-9 code=493.xx after 6 years of age;

<sup>e</sup> *Physician-diagnosed recurrent asthma after 6 years of age* was defined as physician-diagnosed with an ICD-9 code=493.xx at least two or more times after 6 years of age

<sup>f</sup> *Physician-diagnosed asthma after 6 years of age in 2 consecutive years* was defined as physician-diagnosed with an ICD-9 code=493.xx in two consecutive years after 6 years of age.

**Table E3.** The association of weight gain and BMI attained status in the first 4, 12 and 24 months, separately, with asthma.

|                                          | $n_1/n_2^d$ | Crude<br>RR (95% CI)    | Adjusted <sup>a</sup><br>RR (95% CI) | Adjusted <sup>b</sup><br>RR (95% CI) | Adjusted <sup>c</sup><br>RR (95% CI) |
|------------------------------------------|-------------|-------------------------|--------------------------------------|--------------------------------------|--------------------------------------|
| <b>The first 4 months</b>                |             |                         |                                      |                                      |                                      |
| <b>Early-life weight gain categories</b> |             |                         |                                      |                                      |                                      |
| On track                                 | 149/706     | Ref                     | Ref                                  | Ref                                  | Ref                                  |
| Slow weight gain                         | 96/420      | 1.08 (0.86-1.36)        | 1.05 (0.82-1.33)                     | 1.06 (0.84-1.35)                     | 1.09 (0.85-1.38)                     |
| Rapid weight gain                        | 76/295      | 1.22 (0.96-1.55)        | 1.19 (0.93-1.53)                     | 1.19 (0.93-1.52)                     | 1.19 (0.93-1.52)                     |
| Extremely rapid weight gain              | 189/507     | <b>1.77 (1.47-2.12)</b> | <b>1.43 (1.18-1.74)</b>              | <b>1.36 (1.12-1.66)</b>              | <b>1.35 (1.11-1.65)</b>              |
| <b>Early-life BMI attained status</b>    |             |                         |                                      |                                      |                                      |
| Normal                                   | 258/1,177   | Ref                     | Ref                                  | Ref                                  | Ref                                  |
| Underweight                              | 35/131      | 1.22 (0.90-1.65)        | 1.04 (0.74-1.46)                     | 1.07 (0.77-1.50)                     | 0.99 (0.70-1.38)                     |
| Overweight                               | 217/620     | <b>1.60 (1.37-1.86)</b> | <b>1.29 (1.09-1.52)</b>              | <b>1.21 (1.02-1.44)</b>              | <b>1.36 (1.15-1.61)</b>              |
| <b>The first 12 months</b>               |             |                         |                                      |                                      |                                      |
| <b>Early-life weight gain categories</b> |             |                         |                                      |                                      |                                      |
| On track                                 | 107/568     | Ref                     | Ref                                  | Ref                                  | Ref                                  |
| Slow weight gain                         | 37/196      | 1.00 (0.72-1.40)        | 0.98 (0.69-1.40)                     | 0.99 (0.69-1.41)                     | 1.02 (0.72-1.46)                     |
| Rapid weight gain                        | 73/283      | <b>1.37 (1.05-1.78)</b> | 1.20 (0.91-1.58)                     | 1.19 (0.91-1.57)                     | 1.18 (0.90-1.55)                     |
| Extremely rapid weight gain              | 270/771     | <b>1.86 (1.53-2.26)</b> | <b>1.41 (1.11-1.78)</b>              | <b>1.35 (1.07-1.70)</b>              | <b>1.32 (1.04-1.68)</b>              |
| <b>Early-life BMI attained status</b>    |             |                         |                                      |                                      |                                      |
| Normal                                   | 182/905     | Ref                     | Ref                                  | Ref                                  | Ref                                  |
| Underweight                              | 7/39        | 0.89 (0.45-1.77)        | 0.83 (0.42-1.66)                     | 0.83 (0.42-1.66)                     | 0.78 (0.39-1.54)                     |
| Overweight                               | 298/874     | <b>1.70 (1.45-1.99)</b> | <b>1.32 (1.09-1.60)</b>              | <b>1.27 (1.05-1.54)</b>              | <b>1.43 (1.18-1.73)</b>              |
| <b>The first 24 months</b>               |             |                         |                                      |                                      |                                      |
| <b>Early-life weight gain categories</b> |             |                         |                                      |                                      |                                      |
| On track                                 | 103/500     | Ref                     | Ref                                  | Ref                                  | Ref                                  |
| Slow weight gain                         | 36/165      | 1.06 (0.76-1.48)        | 1.01 (0.71-1.44)                     | 1.02 (0.72-1.45)                     | 1.04 (0.73-1.48)                     |
| Rapid weight gain                        | 53/259      | 1.03 (0.77-1.39)        | 0.86 (0.63-1.19)                     | 0.86 (0.63-1.19)                     | 0.84 (0.61-1.16)                     |
| Extremely rapid weight gain              | 272/760     | <b>1.74 (1.42-2.12)</b> | <b>1.30 (1.03-1.64)</b>              | <b>1.25 (1.00-1.57)</b>              | 1.21 (0.96-1.53)                     |
| <b>Early-life BMI attained status</b>    |             |                         |                                      |                                      |                                      |
| Normal                                   | 163/798     | Ref                     | Ref                                  | Ref                                  | Ref                                  |
| Underweight                              | 3/14        | 1.05 (0.38-2.89)        | 1.27 (0.47-3.43)                     | 1.29 (0.48-3.51)                     | 1.18 (0.44-3.16)                     |

|            |         |                         |                         |                         |                         |
|------------|---------|-------------------------|-------------------------|-------------------------|-------------------------|
| Overweight | 298/862 | <b>1.69 (1.44-2.00)</b> | <b>1.32 (1.08-1.61)</b> | <b>1.27 (1.04-1.55)</b> | <b>1.40 (1.15-1.71)</b> |
|------------|---------|-------------------------|-------------------------|-------------------------|-------------------------|

NOTE:

**RR:** risk ratio; **CI:** confidence interval.

<sup>a</sup> Adjusted for maternal age, education, race, smoking, parity, pre-pregnancy BMI, maternal history of asthma, hypertensive disorders, gestational diabetes, child's age, child's sex, birth weight for gestation, breastfeeding status and preterm status.

<sup>b</sup> Adjusted for maternal age, education, race, smoking, parity, pre-pregnancy BMI, maternal history of asthma, hypertensive disorders, gestational diabetes, child's age, child's sex, birth weight for gestation, breastfeeding status and gestational age.

<sup>c</sup> Adjusted for maternal age, education, race, smoking, parity, pre-pregnancy BMI, maternal history of asthma, hypertensive disorders, gestational diabetes, child's age, child's sex, birth weight for gestation, breastfeeding status and birthweight.

<sup>d</sup> n<sub>1</sub>: number of individuals with asthma; n<sub>2</sub>: number of individuals in each exposure group.

**Table E4.** The association of weight gain and BMI attained status in the first 4 and 24 months, respectively, with asthma, stratified by preterm birth status and birthweight.

|                                             | Early life weight gain category |                   |                         |                         | Early-life BMI attained status |                  |                         |
|---------------------------------------------|---------------------------------|-------------------|-------------------------|-------------------------|--------------------------------|------------------|-------------------------|
|                                             | On track                        | Slow              | Rapid                   | Extremely rapid         | Normal                         | Underweight      | Overweight              |
| <b>First 4 months</b>                       |                                 |                   |                         |                         |                                |                  |                         |
| <b>Term children</b>                        |                                 |                   |                         |                         |                                |                  |                         |
| N <sub>1</sub> /N <sub>2</sub> <sup>a</sup> | 114/607                         | 87/395            | 52/215                  | 52/203                  | 203/1,022                      | 32/121           | 70/277                  |
| Crude RR (95% CI)                           | Ref                             | 1.17 (0.91-1.50)  | 1.29 (0.96-1.72)        | <b>1.36 (1.02-1.82)</b> | Ref                            | 1.33 (0.97-1.84) | <b>1.27 (1.00-1.61)</b> |
| Adjusted RR (95% CI) <sup>b</sup>           | Ref                             | 1.02 (0.78-1.34)  | 1.30 (0.96-1.75)        | <b>1.38 (1.04-1.83)</b> | Ref                            | 1.08 (0.75-1.56) | 1.22 (0.96-1.56)        |
| <b>Preterm children</b>                     |                                 |                   |                         |                         |                                |                  |                         |
| N <sub>1</sub> /N <sub>2</sub> <sup>a</sup> | 35/99                           | 9/25              | 24/80                   | 136/303                 | 55/155                         | 3/10             | 146/342                 |
| Crude RR (95% CI)                           | Ref                             | 1.02 (0.57-1.83)  | 0.85 (0.55-1.30)        | 1.27 (0.95-1.70)        | Ref                            | 0.85 (0.32-2.23) | 1.20 (0.94-1.54)        |
| Adjusted RR (95% CI) <sup>b</sup>           | Ref                             | 1.25 (0.69-2.26)  | 1.02 (0.68-1.52)        | <b>1.43 (1.08-1.90)</b> | Ref                            | 0.76 (0.20-2.85) | <b>1.31 (1.03-1.65)</b> |
| <b>Birthweight &lt;2,500g</b>               |                                 |                   |                         |                         |                                |                  |                         |
| N <sub>1</sub> /N <sub>2</sub> <sup>a</sup> | 28/89                           | 7/25              | 21/77                   | 133/301                 | 44/141                         | 2/10             | 143/341                 |
| Crude RR (95% CI)                           | Ref                             | 0.89 (0.44-1.79)  | 0.87 (0.54-1.40)        | <b>1.40 (1.01-1.96)</b> | Ref                            | 0.64 (0.18-2.27) | <b>1.34 (1.02-1.77)</b> |
| Adjusted RR (95% CI) <sup>b</sup>           | Ref                             | 0.99 (0.51-1.92)  | 0.97 (0.62-1.51)        | <b>1.41 (1.05-1.91)</b> | Ref                            | 0.68 (0.18-2.56) | <b>1.32 (1.03-1.70)</b> |
| <b>Birthweight ≥2,500g</b>                  |                                 |                   |                         |                         |                                |                  |                         |
| N <sub>1</sub> /N <sub>2</sub> <sup>a</sup> | 121/617                         | 89/395            | 55/218                  | 56/206                  | 214/1,036                      | 33/121           | 74/279                  |
| Crude RR (95% CI)                           | Ref                             | 1.15 (0.90-1.46)  | 1.29 (0.97-1.70)        | <b>1.39 (1.05-1.82)</b> | Ref                            | 1.32 (0.96-1.80) | <b>1.28 (1.02-1.61)</b> |
| Adjusted RR (95% CI) <sup>b</sup>           | Ref                             | 1.00 (0.77-1.31)  | <b>1.34 (1.01-1.79)</b> | <b>1.46 (1.11-1.91)</b> | Ref                            | 1.06 (0.74-1.51) | <b>1.32 (1.05-1.66)</b> |
| <b>First 24 months</b>                      |                                 |                   |                         |                         |                                |                  |                         |
| <b>Term children</b>                        |                                 |                   |                         |                         |                                |                  |                         |
| N <sub>1</sub> /N <sub>2</sub> <sup>a</sup> | 98/474                          | 34/159            | 44/221                  | 100/378                 | 151/746                        | 3/14             | 122/472                 |
| Crude RR (95% CI)                           | Ref                             | 1.03 (0.73-1.46)  | 0.96 (0.70-1.32)        | <b>1.28 (1.00-1.63)</b> | Ref                            | 1.06 (0.38-2.92) | <b>1.28 (1.04-1.57)</b> |
| Adjusted RR (95% CI) <sup>b</sup>           | Ref                             | 0.99 (0.68-1.42)  | 0.81 (0.57-1.15)        | 1.21 (0.94-1.57)        | Ref                            | 1.32 (0.50-3.53) | 1.23 (0.98-1.54)        |
| <b>Preterm children</b>                     |                                 |                   |                         |                         |                                |                  |                         |
| N <sub>1</sub> /N <sub>2</sub> <sup>a</sup> | 5/26                            | 2/6               | 9/28                    | 171/381                 | 12/52                          | 0/0              | 175/389                 |
| Crude RR (95% CI)                           | Ref                             | 1.73 (0.44-6.89)  | 1.67 (0.64-4.34)        | <b>2.33 (1.05-5.18)</b> | Ref                            | NA               | <b>1.95 (1.17-3.23)</b> |
| Adjusted RR (95% CI) <sup>b</sup>           | Ref                             | 2.15 (0.50-9.12)  | 1.47 (0.53-4.06)        | <b>2.44 (1.02-5.85)</b> | Ref                            | NA               | <b>1.83 (1.08-3.09)</b> |
| <b>Birthweight &lt;2,500g</b>               |                                 |                   |                         |                         |                                |                  |                         |
| N <sub>1</sub> /N <sub>2</sub> <sup>a</sup> | 5/23                            | 1/2               | 5/26                    | 165/387                 | 7/35                           | 0/0              | 169/403                 |
| Crude RR (95% CI)                           | Ref                             | 2.30 (0.47-11.28) | 0.88 (0.29-2.68)        | 1.96 (0.89-4.30)        | Ref                            | NA               | <b>2.10 (1.07-4.11)</b> |

|                                             |        |                  |                  |                         |         |                  |                         |
|---------------------------------------------|--------|------------------|------------------|-------------------------|---------|------------------|-------------------------|
| Adjusted RR (95% CI) <sup>b</sup>           | Ref    | 1.88 (0.39-9.05) | 0.53 (0.17-1.68) | 1.44 (0.63-3.29)        | Ref     | NA               | 1.82 (0.91-3.61)        |
| <b>Birthweight ≥2,500g</b>                  |        |                  |                  |                         |         |                  |                         |
| N <sub>1</sub> /N <sub>2</sub> <sup>a</sup> | 98/477 | 35/163           | 48/223           | 107/373                 | 156/763 | 3/14             | 129/459                 |
| Crude RR (95% CI)                           | Ref    | 1.05 (0.74-1.47) | 1.05 (0.77-1.42) | <b>1.40 (1.10-1.77)</b> | Ref     | 1.05 (0.38-2.89) | <b>1.37 (1.12-1.68)</b> |
| Adjusted RR (95% CI) <sup>b</sup>           | Ref    | 0.98 (0.69-1.39) | 0.93 (0.66-1.29) | <b>1.35 (1.06-1.73)</b> | Ref     | 1.22 (0.47-3.19) | 1.34 (1.08-1.65)        |

NOTE:

**RR**: risk ratio; **CI**: confidence interval.

<sup>a</sup> N<sub>1</sub>: number of individuals with asthma; N<sub>2</sub>: number of individuals in each exposure group.

<sup>b</sup> Adjusted for maternal age, education, race, smoking, parity, pre-pregnancy BMI, maternal history of asthma, hypertensive disorders, gestational diabetes, preterm status, birth weight for gestation, child's age, child's sex, and breastfeeding status.

**Table E5.** The association of weight gain and BMI attained status in the first 4, 12 and 24 months, respectively, with asthma, stratified by birth weight for gestation.

|                                        | Early life weight gain category |                          |                          |                         | Early-life BMI attained status |                  |                         |
|----------------------------------------|---------------------------------|--------------------------|--------------------------|-------------------------|--------------------------------|------------------|-------------------------|
|                                        | On track                        | Slow                     | Rapid                    | Extremely rapid         | Normal                         | Underweight      | Overweight              |
| <b>First 4 months</b>                  |                                 |                          |                          |                         |                                |                  |                         |
| <b>Small for gestational age</b>       |                                 |                          |                          |                         |                                |                  |                         |
| $N_1/N_2^a$                            | 16/71                           | 11/35                    | 9/54                     | 23/85                   | 28/130                         | 3/9              | 28/106                  |
| Crude RR (95% CI)                      | Ref                             | 1.39 (0.73-2.68)         | 0.74 (0.35-1.55)         | 1.20 (0.69-2.09)        | Ref                            | 1.55 (0.58-4.13) | 1.23 (0.78-1.94)        |
| Adjusted RR (95% CI) <sup>b</sup>      | Ref                             | 1.01 (0.51-2.00)         | 0.65 (0.30-1.39)         | 1.04 (0.59-1.81)        | Ref                            | 1.70 (0.73-3.95) | 1.18 (0.74-1.87)        |
| <b>Appropriate for gestational age</b> |                                 |                          |                          |                         |                                |                  |                         |
| $N_1/N_2^a$                            | 126/560                         | 66/298                   | 64/232                   | 162/406                 | 210/913                        | 24/86            | 184/497                 |
| Crude RR (95% CI)                      | Ref                             | 0.98 (0.76-1.28)         | 1.23 (0.95-1.58)         | <b>1.77 (1.46-2.15)</b> | Ref                            | 1.21 (0.85-1.74) | <b>1.61 (1.36-1.90)</b> |
| Adjusted RR (95% CI) <sup>b</sup>      | Ref                             | 0.94 (0.71-1.23)         | 1.19 (0.92-1.54)         | <b>1.43 (1.16-1.76)</b> | Ref                            | 0.96 (0.63-1.45) | <b>1.27 (1.06-1.52)</b> |
| <b>Large for gestational age</b>       |                                 |                          |                          |                         |                                |                  |                         |
| $N_1/N_2^a$                            | 7/75                            | 19/87                    | 3/9                      | 4/16                    | 20/134                         | 8/36             | 5/17                    |
| Crude RR (95% CI)                      | Ref                             | <b>2.34 (1.04-5.27)</b>  | <b>3.57 (1.11-11.46)</b> | 2.68 (0.89-8.10)        | Ref                            | 1.49 (0.71-3.10) | 1.97 (0.85-4.58)        |
| Adjusted RR (95% CI) <sup>b</sup>      | Ref                             | <b>4.44 (1.48-13.32)</b> | <b>5.31 (1.39-20.26)</b> | 3.36 (0.97-11.60)       | Ref                            | 1.61 (0.67-3.87) | 2.61 (0.92-7.44)        |
| <b>First 12 months</b>                 |                                 |                          |                          |                         |                                |                  |                         |
| <b>Small for gestational age</b>       |                                 |                          |                          |                         |                                |                  |                         |
| $N_1/N_2^a$                            | 12/40                           | 3/6                      | 9/46                     | 33/137                  | 20/72                          | 1/2              | 36/155                  |
| Crude RR (95% CI)                      | Ref                             | 1.67 (0.66-4.23)         | 0.65 (0.31-1.39)         | 0.80 (0.46-1.41)        | Ref                            | 1.80 (0.43-7.58) | 0.84 (0.52-1.34)        |
| Adjusted RR (95% CI) <sup>b</sup>      | Ref                             | 2.83 (0.88-9.10)         | 0.76 (0.34-1.69)         | 0.82 (0.45-1.50)        | Ref                            | 2.42 (0.60-9.81) | 0.77 (0.46-1.29)        |
| <b>Appropriate for gestational age</b> |                                 |                          |                          |                         |                                |                  |                         |
| $N_1/N_2^a$                            | 82/453                          | 27/131                   | 61/223                   | 229/606                 | 143/709                        | 3/16             | 253/688                 |
| Crude RR (95% CI)                      | Ref                             | 1.14 (0.77-1.68)         | <b>1.51 (1.13-2.02)</b>  | <b>2.09 (1.67-2.60)</b> | Ref                            | 0.93 (0.33-2.61) | <b>1.82 (1.53-2.17)</b> |
| Adjusted RR (95% CI) <sup>b</sup>      | Ref                             | 1.10 (0.73-1.66)         | 1.33 (0.98-1.80)         | <b>1.58 (1.22-2.06)</b> | Ref                            | 0.78 (0.26-2.28) | <b>1.41 (1.14-1.75)</b> |
| <b>Large for gestational age</b>       |                                 |                          |                          |                         |                                |                  |                         |
| $N_1/N_2^a$                            | 13/75                           | 7/59                     | 3/14                     | 8/28                    | 19/124                         | 3/21             | 9/31                    |
| Crude RR (95% CI)                      | Ref                             | 0.68 (0.29-1.61)         | 1.24 (0.40-3.79)         | 1.65 (0.76-3.55)        | Ref                            | 0.93 (0.30-2.89) | 1.89 (0.95-3.78)        |
| Adjusted RR (95% CI) <sup>b</sup>      | Ref                             | 0.74 (0.29-1.92)         | 0.89 (0.26-3.07)         | 1.53 (0.57-4.09)        | Ref                            | 0.97 (0.25-3.70) | 1.93 (0.82-4.57)        |
| <b>First 24 months</b>                 |                                 |                          |                          |                         |                                |                  |                         |
| <b>Small for gestational age</b>       |                                 |                          |                          |                         |                                |                  |                         |
| $N_1/N_2^a$                            | 11/40                           | 2/5                      | 6/29                     | 36/144                  | 16/56                          | 0/0              | 39/162                  |
| Crude RR (95% CI)                      | Ref                             | 1.45 (0.44-4.77)         | 0.75 (0.31-1.80)         | 0.91 (0.51-1.62)        | Ref                            | NA               | 0.84 (0.51-1.39)        |



|                                             |        |                   |                  |                         |         |                  |                         |
|---------------------------------------------|--------|-------------------|------------------|-------------------------|---------|------------------|-------------------------|
| Adjusted RR (95% CI) <sup>b</sup>           | Ref    | 2.31 (0.38-13.92) | 0.74 (0.24-2.26) | 0.96 (0.50-1.84)        | Ref     | NA               | 0.87 (0.49-1.55)        |
| <b>Appropriate for gestational age</b>      |        |                   |                  |                         |         |                  |                         |
| N <sub>1</sub> /N <sub>2</sub> <sup>a</sup> | 81/389 | 25/110            | 45/205           | 228/591                 | 127/616 | 2/8              | 250/671                 |
| Crude RR (95% CI)                           | Ref    | 1.09 (0.73-1.62)  | 1.05 (0.76-1.46) | <b>1.85 (1.49-2.31)</b> | Ref     | 1.21 (0.36-4.07) | <b>1.81 (1.50-2.17)</b> |
| Adjusted RR (95% CI) <sup>b</sup>           | Ref    | 1.00 (0.66-1.52)  | 0.89 (0.64-1.25) | <b>1.35 (1.05-1.74)</b> | Ref     | 1.38 (0.39-4.92) | <b>1.38 (1.11-1.72)</b> |
| <b>Large for gestational age</b>            |        |                   |                  |                         |         |                  |                         |
| N <sub>1</sub> /N <sub>2</sub> <sup>a</sup> | 11/71  | 9/50              | 2/15             | 8/25                    | 20/126  | 1/6              | 9/29                    |
| Crude RR (95% CI)                           | Ref    | 1.16 (0.52-2.60)  | 0.86 (0.21-3.50) | 2.07 (0.94-4.56)        | Ref     | 1.05 (0.17-6.61) | 2.07 (0.37-11.38)       |
| Adjusted RR (95% CI) <sup>b</sup>           | Ref    | 1.45 (0.61-3.43)  | 0.27 (0.03-2.28) | 1.92 (0.68-5.38)        | Ref     | 1.96 (0.99-3.85) | 1.80 (0.77-4.18)        |

NOTE:

**RR**: risk ratio; **CI**: confidence interval.

<sup>a</sup> N<sub>1</sub>: number of individuals with asthma; N<sub>2</sub>: number of individuals in each exposure group.

<sup>b</sup> Adjusted for maternal age, education, race, smoking, parity, pre-pregnancy BMI, maternal history of asthma, hypertensive disorders, gestational diabetes, preterm status, birth weight for gestation, child's age, child's sex, and breastfeeding status.

**Table E6.** The association of weight gain and BMI attained status in the first 4, 12, and 24 months, respectively, with asthma.

|                                                                       | Early life weight gain category |                  |                         |                         | Early-life BMI attained status |                  |                         |
|-----------------------------------------------------------------------|---------------------------------|------------------|-------------------------|-------------------------|--------------------------------|------------------|-------------------------|
|                                                                       | On track                        | Slow             | Rapid                   | Extremely rapid         | Normal                         | Underweight      | Overweight              |
| <b>First 4 months</b> (n <sub>1</sub> /n <sub>2</sub> ) <sup>a</sup>  | 149/706                         | 96/420           | 76/295                  | 189/507                 | 258/1,177                      | 35/131           | 217/620                 |
| Crude RR (95% CI)                                                     | Ref                             | 1.08 (0.86-1.36) | 1.22 (0.96-1.55)        | <b>1.77 (1.47-2.12)</b> | Ref                            | 1.22 (0.90-1.65) | <b>1.60 (1.37-1.86)</b> |
| Adjusted RR (95% CI) <sup>b</sup>                                     | Ref                             | 1.07 (0.84-1.36) | 1.19 (0.93-1.52)        | <b>1.44 (1.19-1.75)</b> | Ref                            | 1.07 (0.76-1.51) | <b>1.27 (1.08-1.50)</b> |
| Adjusted RR (95% CI) <sup>c</sup>                                     | Ref                             | 1.05 (0.83-1.35) | 1.20 (0.94-1.35)        | <b>1.42 (1.16-1.73)</b> | Ref                            | 1.06 (0.76-1.49) | <b>1.25 (1.05-1.48)</b> |
| <b>First 12 months</b> (n <sub>1</sub> /n <sub>2</sub> ) <sup>a</sup> | 107/568                         | 37/196           | 73/283                  | 270/771                 | 182/905                        | 7/39             | 298/874                 |
| Crude RR (95% CI)                                                     | Ref                             | 1.00 (0.72-1.40) | <b>1.37 (1.05-1.78)</b> | <b>1.86 (1.53-2.26)</b> | Ref                            | 0.89 (0.45-1.77) | <b>1.70 (1.45-1.99)</b> |
| Adjusted RR (95% CI) <sup>b</sup>                                     | Ref                             | 1.03 (0.72-1.47) | 1.19 (0.91-1.56)        | <b>1.40 (1.11-1.77)</b> | Ref                            | 0.94 (0.47-1.90) | <b>1.30 (1.07-1.59)</b> |
| Adjusted RR (95% CI) <sup>c</sup>                                     | Ref                             | 0.98 (0.69-1.40) | 1.20 (0.91-1.58)        | <b>1.40 (1.10-1.77)</b> | Ref                            | 0.82 (0.41-1.62) | <b>1.30 (1.06-1.59)</b> |
| <b>First 24 months</b> (n <sub>1</sub> /n <sub>2</sub> ) <sup>a</sup> | 103/500                         | 36/165           | 53/259                  | 272/760                 | 163/798                        | 3/14             | 298/862                 |
| Crude RR (95% CI)                                                     | Ref                             | 1.06 (0.76-1.48) | 1.03 (0.77-1.39)        | <b>1.74 (1.42-2.12)</b> | Ref                            | 1.05 (0.38-2.89) | <b>1.69 (1.44-2.00)</b> |
| Adjusted RR (95% CI) <sup>b</sup>                                     | Ref                             | 1.04 (0.73-1.48) | 0.84 (0.61-1.15)        | <b>1.28 (1.02-1.62)</b> | Ref                            | 1.37 (0.51-3.71) | <b>1.30 (1.07-1.59)</b> |
| Adjusted RR (95% CI) <sup>c</sup>                                     | Ref                             | 1.00 (0.70-1.42) | 0.87 (0.63-1.19)        | <b>1.28 (1.01-1.62)</b> | Ref                            | 1.25 (0.45-3.47) | <b>1.30 (1.05-1.59)</b> |

NOTE:

**RR:** risk ratio; **CI:** confidence interval.

<sup>a</sup> n<sub>1</sub>: number of individuals with asthma; n<sub>2</sub>: number of individuals in each exposure group.

<sup>b</sup> Adjusted for maternal age, education, race, smoking, parity, pre-pregnancy BMI, maternal history of asthma, hypertensive disorders, gestational diabetes, preterm status, birth weight for gestation, child's birth year, child's age, child's sex, and breastfeeding status.

<sup>c</sup> Adjusted for maternal age, education, race, smoking, parity, pre-pregnancy BMI, maternal history of asthma, hypertensive disorders, gestational diabetes, preterm status, birth weight for gestation, child's birth year, child's age, child's sex, breastfeeding status, and birth year.
